# Supplementary material
Source: publisher figshare collection journal article supplement (https://frontiersin.figshare.com/ndownloader/files/18024122)
Supplement: Supplementary file 1 [file 18024122]

## Sheet: Core genera
#Datasets	Maize Start	Maize silage (week 1)	Maize silage (week 5)	Maize silage (week 9)	Maize silage (week 12)	Maize silage (week 16)	Chlorella Start	Ch vulgaris (week 1)	Ch vulgaris (week 5)	Ch vulgaris (week 9)	Ch vulgaris (week 12)	Ch vulgaris (week 16)	Co Start	Co-digestion (week 1)	Co-digestion (week 5)	Co-digestion (week 9)	Co-digestion (week 12)	Co-digestion (week 16)
Acetivibrio	78	46	74	117	94	83	78	27	39	21	19	14	78	30	54	64	34	33
Acetobacterium	55	43	38	51	51	73	55	18	48	29	38	44	55	24	31	24	60	33
Acholeplasma	715	706	1009	833	436	59	715	1003	7145	798	270	2301	715	923	5433	951	113	281
Actinomyces	15	18	78	53	72	117	15	238	22	291	448	309	15	60	22	94	404	336
Alistipes	94	102	86	93	117	111	94	142	82	118	107	65	94	121	76	159	134	105
Alkaliflexus	101	98	56	71	48	52	101	22	111	23	37	25	101	54	105	43	23	29
Alkaliphilus	68	57	31	43	44	44	68	32	78	41	36	113	68	31	81	37	57	37
Aminobacterium	83	58	101	55	60	85	83	277	54	129	79	76	83	157	53	82	85	65
Anaerophaga	30	42	19	28	35	37	30	21	37	20	30	16	30	18	36	24	26	22
Anaerovorax	162	49	54	62	104	147	162	18	28	13	24	21	162	41	34	24	72	44
Bacillus	255	295	229	234	225	257	255	212	271	211	200	266	255	186	252	208	250	224
Bacteroides	1036	929	994	945	1066	922	1036	854	856	782	608	420	1036	1051	756	1105	775	722
Blautia	55	55	59	64	50	61	55	39	50	47	47	51	55	48	52	42	76	49
Brevibacillus	29	36	37	37	46	49	29	19	27	12	21	23	29	28	39	21	35	27
Butyrivibrio	93	65	96	118	112	116	93	60	71	67	80	98	93	65	72	68	144	98
Caldicoprobacter	303	144	145	139	123	151	303	78	118	56	70	64	303	103	114	125	180	203
Caldithrix	29	24	19	28	44	33	29	39	19	59	131	86	29	34	20	30	33	99
Candidatus Cloacimonas	6131	6562	4035	5355	9060	7729	6131	14580	3870	11879	3149	988	6131	12005	5964	14433	8282	3894
Capnocytophaga	24	21	23	21	20	20	24	32	18	31	47	22	24	21	15	27	34	52
Chryseobacterium	43	39	36	41	84	62	43	49	43	47	113	76	43	59	41	42	52	74
Clostridium	1763	3314	3355	2678	4005	4184	1763	1667	3282	901	1336	1008	1763	1567	3092	1026	1659	1337
Desulfitibacter	69	49	51	36	32	55	69	26	45	35	44	58	69	36	48	31	56	52
Desulfitobacterium	106	67	80	89	70	94	106	50	74	45	34	30	106	43	55	48	62	47
Desulfosporosinus	137	77	68	79	70	68	137	58	67	62	40	51	137	50	75	41	55	52
Desulfotomaculum	252	180	178	148	162	197	252	148	151	130	98	155	252	136	183	123	166	135
Desulfovibrio	42	218	127	85	39	33	42	41	47	46	41	44	42	109	158	43	44	48
Dethiobacter	76	47	33	28	44	64	76	16	27	20	30	57	76	27	45	27	59	65
Draconibacterium	42	56	38	51	91	82	42	79	41	130	168	95	42	49	39	66	101	139
Dysgonomonas	44	51	60	69	74	71	44	132	45	108	76	63	44	83	68	113	103	141
Enterococcus	46	41	68	55	135	50	46	76	50	83	163	138	46	109	63	105	249	168
Eubacterium	58	46	59	61	75	85	58	58	62	48	51	44	58	65	47	66	86	65
Fermentimonas	330	581	1415	1296	1699	2008	330	1674	1639	707	170	142	330	1423	899	868	581	293
Flavobacterium	81	71	83	78	107	98	81	106	85	129	262	175	81	90	73	92	103	163
Flexilinea	20	18	21	22	25	33	20	34	20	36	38	70	20	26	18	21	48	30
Fusobacterium	55	41	40	46	44	60	55	29	41	40	57	54	55	28	33	38	65	49
Geobacillus	29	30	14	22	16	16	29	14	18	13	19	23	29	21	24	15	17	18
Geobacter	36	43	19	28	21	34	36	40	28	31	46	61	36	31	39	43	30	41
Geofilum	220	247	180	160	148	130	220	54	197	57	100	51	220	130	210	73	55	86
Herbinix	1361	2358	2650	2403	2081	2692	1361	771	2027	353	638	406	1361	1044	2343	942	1145	1135
Holdemania	67	37	32	32	72	63	67	21	40	26	33	31	67	31	28	24	64	50
Hungatella	27	29	25	29	33	40	27	31	29	38	24	70	27	22	29	35	36	23
Intestinimonas	44	26	30	32	32	50	44	15	38	20	23	23	44	17	16	20	54	32
Lachnoclostridium	133	121	145	172	126	133	133	92	138	88	69	86	133	87	123	101	127	117
Lactobacillus	99	93	65	81	52	41	99	69	87	76	75	107	99	62	80	62	75	68
Lascolabacillus	40	64	139	129	158	200	40	189	163	83	21	11	40	165	107	84	62	31
Lentimicrobium	176	170	156	151	338	269	176	521	209	1112	3287	2059	176	364	160	343	725	2142
Mageeibacillus	23	42	44	34	43	53	23	21	58	45	68	43	23	22	27	24	95	66
Mesotoga	209	183	240	393	522	338	209	149	139	115	45	65	209	235	199	106	54	26
Methanobacterium	568	870	856	427	1181	1117	568	415	929	262	637	528	568	462	803	222	715	645
Methanoculleus	2396	2995	4960	3998	145	100	2396	1985	1531	3607	70	1396	2396	4704	2917	4979	76	165
Methanosaeta	3285	5283	748	164	577	617	3285	2876	4907	1095	5134	261	3285	565	5120	123	672	882
Methanosarcina	781	1025	8606	1935	11693	10281	781	886	623	151	214	291	781	7427	667	4134	11602	9052
Moorella	60	34	34	31	26	30	60	26	45	26	30	64	60	35	35	23	45	42
Odoribacter	25	13	11	16	32	16	25	26	17	17	24	15	25	24	16	23	19	16
Oribacterium	22	21	32	33	21	26	22	21	27	22	14	28	22	15	24	25	15	35
Oscillibacter	55	50	64	87	49	74	55	31	56	38	37	49	55	43	42	37	73	64
Paenibacillus	298	307	304	310	235	290	298	229	307	201	130	184	298	215	341	225	235	181
Paludibacter	51	77	86	95	56	37	51	48	80	75	60	54	51	55	43	113	34	64
Parabacteroides	56	61	48	65	61	63	56	75	54	86	77	67	56	77	49	103	71	63
Pedobacter	25	29	27	27	43	28	25	49	33	60	120	69	25	40	24	43	45	72
Pelotomaculum	81	67	82	44	69	96	81	39	68	30	27	21	81	45	58	30	62	39
Peptoclostridium	26	30	35	22	42	28	26	26	18	26	18	36	26	26	20	25	19	29
Peptoniphilus	42	31	41	49	51	58	42	33	44	81	193	261	42	32	41	34	136	132
Porphyromonas	78	67	62	73	87	78	78	122	51	147	162	120	78	73	48	161	130	142
Prevotella	290	257	255	217	223	237	290	237	224	189	143	97	290	269	222	300	207	194
Prolixibacter	23	32	18	25	56	40	23	38	23	44	81	48	23	34	16	29	29	60
Proteiniphilum	230	351	450	523	485	855	230	547	350	813	617	585	230	411	281	850	611	540
Pseudomonas	88	349	238	827	115	34	88	60	209	146	68	162	88	125	444	303	37	275
Ruminiclostridium	2037	1463	1203	1379	1318	1298	2037	400	1002	343	293	242	2037	708	1132	750	684	558
Ruminococcus	135	121	135	121	107	119	135	77	93	74	84	92	135	93	99	83	115	109
Saccharicrinis	29	24	15	23	40	38	29	24	15	31	46	28	29	20	19	15	16	34
Salinivirga	48	70	46	42	64	59	48	239	80	142	212	144	48	68	56	70	57	151
Sedimentibacter	1786	495	1232	1254	1112	2170	1786	225	509	99	81	29	1786	431	460	154	256	115
Smithella	51	79	37	40	39	24	51	100	18	57	33	26	51	59	64	68	27	23
Sphaerochaeta	805	734	2701	3858	688	395	805	2001	717	2179	296	556	805	2237	585	1751	281	447
Spirochaeta	77	61	51	70	48	46	77	89	57	73	33	42	77	69	51	52	38	38
Staphylococcus	24	27	17	31	13	18	24	22	23	23	14	23	24	27	22	23	14	17
Streptococcus	323	552	899	326	1191	475	323	218	473	95	132	161	323	647	503	629	1877	898
Streptomyces	27	57	49	54	34	29	27	34	40	34	23	29	27	54	76	37	28	29
Sunxiuqinia	30	27	34	34	48	38	30	29	30	45	72	40	30	33	29	31	40	45
Syntrophaceticus	170	114	57	48	36	47	170	46	113	28	34	90	170	47	107	24	46	58
Syntrophomonas	746	250	321	360	436	707	746	691	239	464	614	385	746	405	239	260	659	401
Tannerella	39	53	39	28	40	36	39	51	30	69	46	35	39	29	26	71	56	27
Tepidanaerobacter	416	109	126	99	108	168	416	90	107	99	88	136	416	90	124	75	133	103
Terrisporobacter	108	257	232	123	175	222	108	115	234	63	117	95	108	117	258	61	155	107
Thermacetogenium	57	56	34	30	28	27	57	37	41	41	36	34	57	42	54	28	36	35
Thermoactinomyces	31	66	61	50	67	103	31	48	64	20	24	24	31	47	101	21	42	35
Thermobacillus	19	90	109	86	35	40	19	14	54	15	13	13	19	45	103	28	33	20
Treponema	444	343	415	521	239	161	444	2590	351	1951	280	430	444	615	326	598	169	197
Turicibacter	111	209	171	131	124	189	111	99	189	62	116	92	111	103	203	53	127	83
Tyzzerella	19	54	23	22	30	24	19	18	71	24	30	18	19	21	40	25	41	24
Youngiibacter	52	29	37	38	42	40	52	18	33	33	24	30	52	21	39	22	29	26

## Sheet: Core mean
#Datasets	Mean	Oszlop1
Candidatus Cloacimonas	7232.11
Methanosarcina	3940.56
Methanoculleus	2267.56
Clostridium	2205.56
Methanosaeta	2159.94
Herbinix	1503.94
Acholeplasma	1355.89
Sphaerochaeta	1213.39
Ruminiclostridium	1049.11
Fermentimonas	910.278
Bacteroides	882.944
Sedimentibacter	776.667
Lentimicrobium	696.333
Methanobacterium	654.056
Treponema	584.333
Streptococcus	558.056
Proteiniphilum	497.722
Syntrophomonas	481.611
Paenibacillus	254.889
Bacillus	238.056
Prevotella	230.056
Pseudomonas	203.111
Mesotoga	190.889
Desulfotomaculum	169.222
Tepidanaerobacter	161.278
Caldicoprobacter	151.222
Terrisporobacter	147.5
Actinomyces	144.833
Geofilum	141
Turicibacter	126.889
Lachnoclostridium	118
Flavobacterium	108.778
Ruminococcus	107.056
Alistipes	105.556
Porphyromonas	97.6111
Lascolabacillus	95.8889
Enterococcus	93.9444
Aminobacterium	92.5
Salinivirga	91.3333
Butyrivibrio	89.3889
Syntrophaceticus	78.0556
Lactobacillus	77.2222
Dysgonomonas	77.1667
Draconibacterium	75.0556
Peptoniphilus	74.6111
Desulfosporosinus	73.5556
Desulfovibrio	69.3889
Anaerovorax	67.8333
Desulfitobacterium	67
Parabacteroides	66
Paludibacter	62.7778
Alkaliflexus	61.1111
Eubacterium	60.6667
Spirochaeta	58.2778
Pelotomaculum	56.6667
Chryseobacterium	54.8333
Acetivibrio	54.6111
Alkaliphilus	53.6667
Oscillibacter	53.2778
Blautia	53.0556
Thermoactinomyces	48.1111
Desulfitibacter	47.8333
Smithella	47.0556
Fusobacterium	46.1111
Dethiobacter	45.3889
Caldithrix	43.6111
Holdemania	43.6111
Pedobacter	43.5556
Acetobacterium	42.7778
Thermobacillus	41.9444
Mageeibacillus	41.8889
Tannerella	41.8333
Thermacetogenium	40.5556
Moorella	39.2222
Streptomyces	38.2222
Sunxiuqinia	36.9444
Geobacter	35.7222
Prolixibacter	35.6667
Youngiibacter	34.2778
Hungatella	31.8889
Intestinimonas	31.1111
Brevibacillus	30.2222
Tyzzerella	29
Flexilinea	28.8889
Anaerophaga	27.8333
Peptoclostridium	26.5556
Capnocytophaga	26.4444
Saccharicrinis	26.3889
Oribacterium	23.6111
Staphylococcus	21.4444
Geobacillus	20.3889
Odoribacter	20

## Sheet: Title
	Supplementary Table 2. Core microbiome calculation results. The “Core genera” lists the taxa present in all samples and the read numbers belonging to each sampling points. The genera indicated with red letters are discussed in the text. The “Core mean” arranges and plots the genera according to their mean reads, i.e. the average of reads in all 16 metagenomes.
